# Supplementary material for: Clinical Outcomes of Third-Generation Cephalosporins, Carbapenems, and Piperacillin-Tazobactam in the Treatment of AmpC- Associated Enterobacterales Species Sepsis
Source: Research Square preprint supplement (doi:10.21203/rs.3.rs-7651779/v1), 2025-11-01
Supplement: Supplementary file 1 [file a045ed279cfa035eb4158078.docx]

**Supplementary Table 1. Standardized mean differences (SMDs) for baseline characteristics across antibiotic treatment groups**

| **Variable** | **3GCs vs Carbapenem (Absolute SMD)** | **3GCs vs PTZ (Absolute SMD)** | **Carbapenem vs PTZ (Absolute SMD)** |
| --- | --- | --- | --- |
| Age | 0.61 | 0.09 | 0.73 |
| Shock | 0.45 | 0.37 | 0.09 |
| Mechanical ventilation | 0.16 | 0.01 | 0.15 |
| ICU admission | 0.38 | 0.08 | 0.46 |
| Central line | 0.26 | 0.26 | 0.00 |
| Foley catheter | 0.55 | 0.26 | 0.31 |
